# Supplementary material
Source: publisher site journal article supplement (https://www.dovepress.com/article/361466)
Supplement: Supplementary file 1 [file get_supplementary_file.php]

**Supplementary Table 1. Symptom scoring system**

| **Score** | **0** | **1** | **2** | **3** |
| --- | --- | --- | --- | --- |
| **Conjunctivitis** | Eyes closed or bleared with serous discharge | One eye closed with serous discharge | Eyes opened with serous discharge | Normal |
| **Stool consistency** | Diarrhea, thin watery or transparent stool (unformed) | Loose stool (unformed) | Slightly moist stool (formed) | Normal |
| **Hair coat** | Rough and dull fur, ungroomed | Reduced grooming, rough hair coat | slightly bristling | Well groomed, shiny fur |
| **Activity after stimulation** | Lethargic, only lifting of the head after moderate stimulation | Less alert, <5 steps after stimulation | Inactive, less alert | Normal locomotion and reaction |

*This table is a refinement of the existing scoring system.1

1. Kadl A, Pontiller J, Exner M, Leitinger N. Single bolus injection of bilirubin improves the clinical outcome in a mouse model of endotoxemia. *Shock.* 2007;28(5):582-588.
